# Supplementary material for: Practical Strategies for Extreme Missing Data Imputation in Dementia Diagnosis
Source: bioRxiv or medRxiv preprint supplement (doi:10.1101/2020.07.13.20146118), 2021-04-08
Supplement: Supplementary file [file media-1.pdf]

# Supplementary Materials

## Practical Strategies for Extreme Missing Data Imputation in Dementia Diagnosis

Niamh McCombe, Shuo Liu, Xuemei Ding, Girijesh Prasad, *Senior Member, IEEE*, Magda Bucholc, David P. Finn, Stephen Todd, Paula L. McClean, KongFatt Wong-Lin, *Member, IEEE\**, Alzheimer's Disease Neuroimaging Initiative (ADNI)

Corresponding author: KongFatt Wong-Lin. [k.wong-lin@ulster.ac.uk](mailto:k.wong-lin@ulster.ac.uk)

NM, SL, XD, GP, MB and KW-L ([k.wong-lin@ulster.ac.uk](mailto:k.wong-lin@ulster.ac.uk)) are with the Intelligent Systems Research Centre, Ulster University. DPF is with Pharmacology and Therapeutics, School of Medicine, National University of Ireland Galway. ST is with Altnagelvin Area Hospital, Western Health and Social Care Trust. PLM is with Ulster University, Northern Ireland Centre for Stratified Medicine, Biomedical Sciences Research Institute, Clinical Translational Research and Innovation Centre.

**SUPPLEMENTARY TABLE I: IMPUTATION AND CLASSIFICATION WORKFLOWS ADDITIONAL RESULTS**

|                                          | Training dataset imputation | Test dataset treatment | Classifier            | Imputation time (s) | Classification time (s) | AUC    | Accuracy | Sensitivity (positive class MCI/AD) | Specificity (positive class MCI/AD) | Sensitivity (positive class AD) | Specificity (positive class AD) |
|------------------------------------------|-----------------------------|------------------------|-----------------------|---------------------|-------------------------|--------|----------|-------------------------------------|-------------------------------------|---------------------------------|---------------------------------|
| A                                        | mean                        | mean                   | RF                    | 0.002               | 1.974                   | 0.871  | 0.680    | 0.786                               | 0.824                               | 0.839                           | 0.878                           |
| B                                        | class mean                  | reduced feature        | RF                    | 0.010               | 1.297                   | 0.878  | 0.709    | 0.792                               | 0.826                               | 0.839                           | 0.904                           |
| C                                        | RF                          | RF                     | RF                    | 11.520              | 1.950                   | 0.889  | 0.743    | 0.864                               | 0.795                               | 0.828                           | 0.913                           |
| D                                        | mean                        | reduced feature        | RF                    | 0.002               | 2.029                   | 0.867  | 0.632    | 0.767                               | 0.818                               | 0.914                           | 0.831                           |
| E                                        | RF                          | reduced feature        | RF                    | 11.444              | 1.860                   | 0.876  | 0.716    | 0.839                               | 0.789                               | 0.839                           | 0.896                           |
| F                                        | PMM5 multiple               | PMM5 multiple          | modal imputed outcome | 3.179               | 0.021                   | 0.839  | 0.740    | 0.833                               | 0.743                               | 0.548                           | 0.976                           |
| G                                        | PMM5 multiple               | PMM5 multiple          | RF ensemble           | 3.179               | 14.566                  | 0.885  | 0.738    | 0.851                               | 0.797                               | 0.806                           | 0.918                           |
| H                                        | none                        | none                   | NB                    | 0.000               | 0.003                   | 0.885  | 0.713    | 0.699                               | 0.900                               | 0.796                           | 0.945                           |
| I                                        | PMM5 multiple               | reduced feature        | RF ensemble           | 3.179               | 10.100                  | 0.891  | 0.736    | 0.836                               | 0.822                               | 0.860                           | 0.905                           |
| J                                        | Mean                        | Mean                   | SVM                   | 0.002               | 1.717                   | 0.867  | 0.674    | 0.784                               | 0.774                               | 0.806                           | 0.902                           |
| K                                        | RF                          | RF                     | SVM                   | 11.520              | 2.313                   | 0.882  | 0.729    | 0.849                               | 0.789                               | 0.806                           | 0.913                           |
| L                                        | RF                          | reduced feature        | SVM                   | 11.520              | 1.694                   | 0.893  | 0.727    | 0.823                               | 0.845                               | 0.871                           | 0.895                           |
| M                                        | PMM15 mean                  | RF                     | RF                    | 10.315              | 2.150                   | 0.887  | 0.751    | 0.859                               | 0.799                               | 0.796                           | 0.927                           |
| N                                        | PMM15 mean                  | Reduced feature        | RF                    | 10.315              | 0.318                   | 0.884  | 0.712    | 0.843                               | 0.772                               | 0.860                           | 0.899                           |
| O                                        | PMM15 mean                  | RF                     | SVM                   | 10.315              | 0.122                   | 0.888  | 0.749    | 0.868                               | 0.787                               | 0.817                           | 0.920                           |
| P                                        | PMM15 mean                  | Reduced feature        | SVM                   | 10.315              | 0.142                   | 0.874  | 0.714    | 0.857                               | 0.743                               | 0.828                           | 0.907                           |
| <i>Ground truth with no missing data</i> |                             |                        |                       |                     |                         |        |          |                                     |                                     |                                 |                                 |
| -                                        | -                           | -                      | RF                    | -                   | 0.862                   | 0.9101 | 0.784    | 0.883                               | 0.851                               | 0.871                           | 0.918                           |
| -                                        | -                           | -                      | SVM                   | -                   | 0.125                   | 0.9119 | 0.783    | 0.874                               | 0.864                               | 0.903                           | 0.913                           |
| -                                        | -                           | -                      | NB                    | -                   | 0.007                   | 0.8944 | 0.722    | 0.706                               | 0.939                               | 0.838                           | 0.929                           |

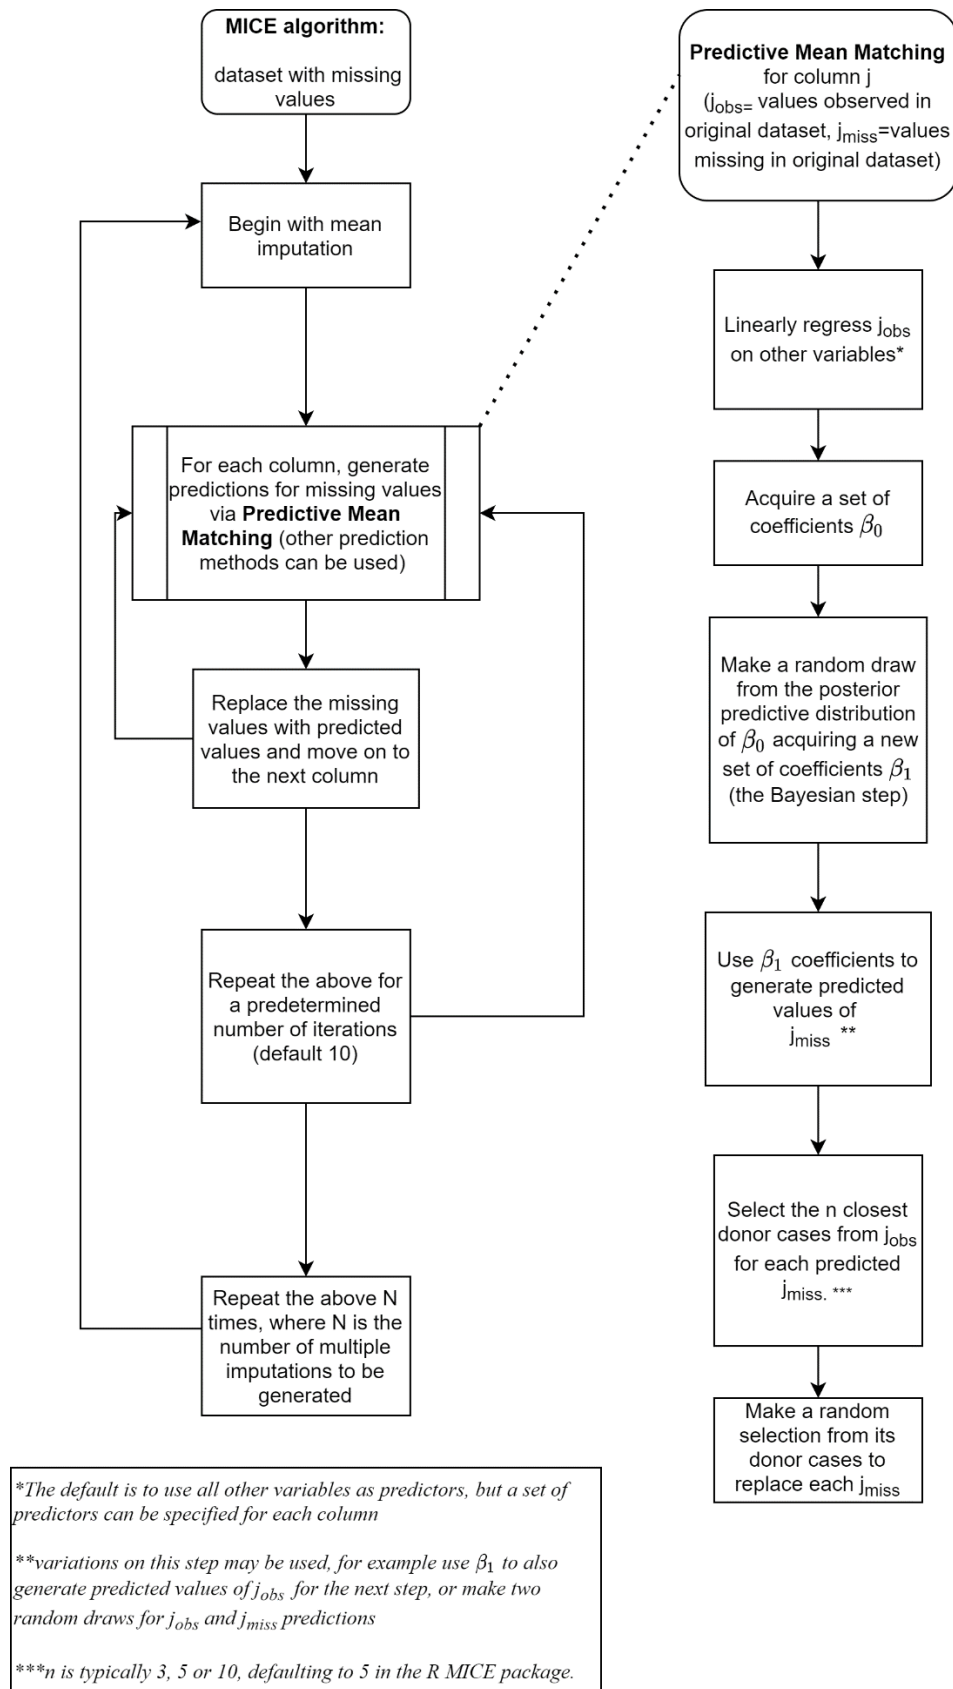

Supplementary Fig. 1. Multiple Imputation by Chained Equations (MICE) using Predictive Mean Matching (PMM). See [1]–[3] for further details.

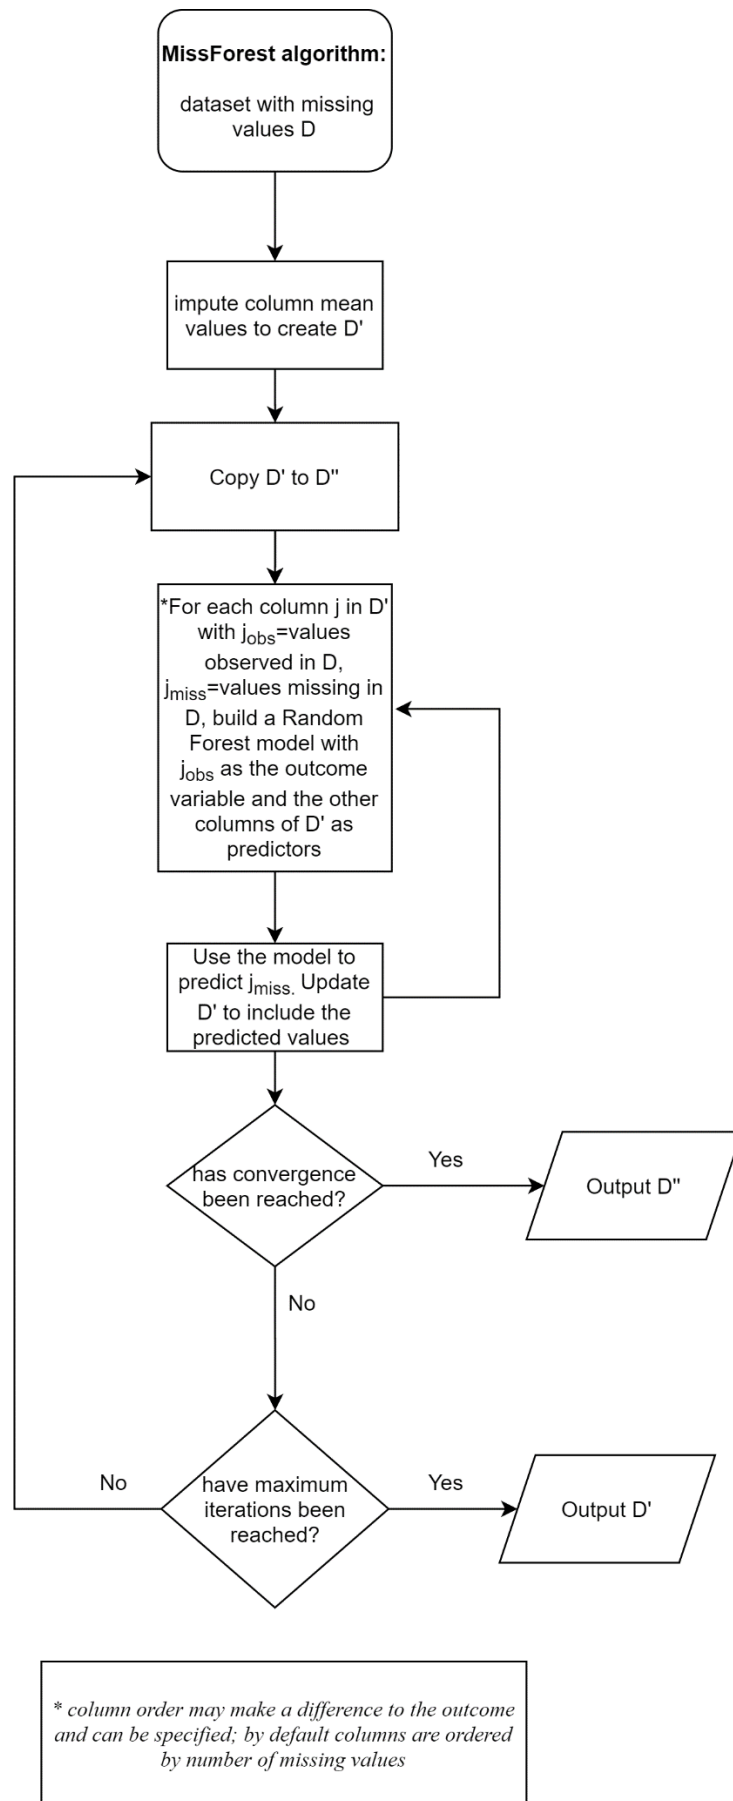

Supplementary Fig. 2. MissForest imputation algorithm. See [4] for further details.

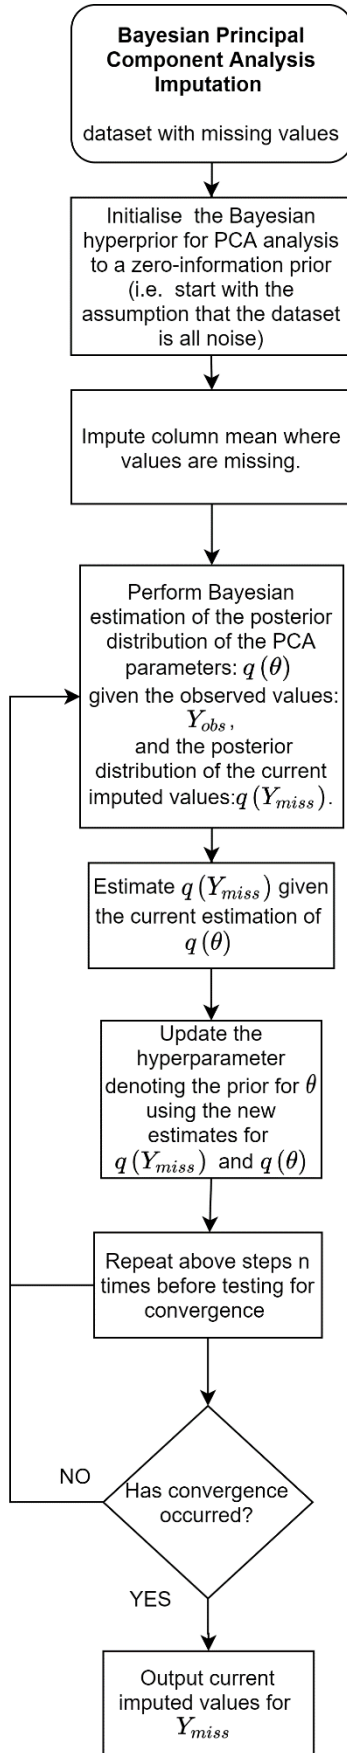

Supplementary Fig. 3. Imputation by Bayesian Principal Component Analysis (BPCA). The goal is to estimate the weights, loadings and noise (denote collectively as  $\theta$ ) of a principal component analysis (PCA) of the data in the presence of missing values. Simultaneously, use the estimated PCA,  $\theta$ , to generate imputed values for the values that are missing -  $Y_{miss}$ . An iterative estimation method is used, where  $Y_{miss}$  is imputed first, then  $\theta$  is estimated, followed by imputation of  $Y_{miss}$ , etc. This series of alternating iterative steps is similar to the well-known Expectation Maximisation algorithm, but here the computation is on the posterior distribution (i.e. likelihood adjusted for prior) of  $\theta$ ,  $q(\theta)$ , and the posterior distribution of  $Y_{miss}$ ,  $q(Y_{miss})$ , rather than the likelihood. This method of missing value imputation is developed in [5], which is based on prior work in [6] and [7]. The version used in the paper was implemented in the `pcaMethods` package [8] in R [9].

## REFERENCES

---

- [1] S. van Buuren and K. Groothuis-Oudshoorn, “mice: Multivariate imputation by chained equations in R,” *J. Stat. Softw.*, vol. 45, no. 3, pp. 1–67, 2011.
- [2] S. van Buuren, *Flexible Imputation of Missing Data*. CRC Press, 2012.
- [3] M. J. Azur, E. A. Stuart, C. Frangakis, and P. J. Leaf, “Multiple imputation by chained equations: What is it and how does it work?,” *Int. J. Methods Psychiatr. Res.*, vol. 20, no. 1, pp. 40–49, Mar. 2011.
- [4] D. J. Stekhoven, P. Bühlmann, and P. Bühlmann, “missForest: Non-parametric missing value imputation for mixed-type data,” *Bioinformatics*, vol. 28, no. 1, pp. 112–118, 2012.
- [5] S. Oba, M. A. Sato, I. Takemasa, M. Monden, K. I. Matsubara, and S. Ishii, “A Bayesian missing value estimation method for gene expression profile data,” *Bioinformatics*, vol. 19, no. 16, pp. 2088–2096, 2003.
- [6] M. E. Tipping and C. M. Bishop, “Probabilistic Principal Component Analysis,” *J. R. Stat. Soc. Ser. B (Statistical Methodol.)*, vol. 61, no. 3, pp. 611–622, Aug. 1999.
- [7] C. M. Bishop, “Bayesian PCA,” in *Advances in Neural Information Processing Systems*, 1999, pp. 382–388.
- [8] L. Wolfram Stacklies, H. Redestig, and K. Wright, “pcaMethods—a bioconductor package providing PCA methods for incomplete data,” *Bioinformatics*, vol. 23, no. 9, pp. 1164–1167, 2007.
- [9] R Core Team, “R: A Language and Environment for Statistical Computing.” Vienna, Austria, 2019.
